# Supplementary material
Source: PubMed Central journal article supplement (PMC3186329)
Supplement: supp_blood-2010-12-328252_Document1.pdf [file supp_blood-2010-12-328252_Document1.pdf]

---

**Table S1. 10-fold cross-validation procedure**

Divide the training set randomly into 10 parts of approximately equal size. Let  $m$  denote the number of most significant genes to calculate a gene score and  $q$  the  $q$ -th percentile to dichotomize the score.

Given  $(m, q)$ , where  $m$  and  $q$  are in reasonable ranges, repeat the following steps:

- (1) Train the model with 9 parts of the training set: First select differentially expressed genes with a 0.005 p-value cutoff, order the selected genes by univariate association with survival, then calculate the gene score based on the top  $m$  genes and calculate the  $q$ -th percentile of this score, which we denote by  $w$ .
- (2) Test the model with the remaining part: Calculate gene scores using the top  $m$  genes identified in step 1 and dichotomize the scores at  $w$  obtained from step 1.
- (3) Repeat step 1–2 10 times: Every sample in the training set is now assigned a label of 0 or 1. Compute the log<sub>r</sub>rank test between group 0 and 1 and record the p-value.

Select the best combination of  $(m, q)$  that gives the lowest p-value.

**Table S2.1. P values regarding gene expression changes 48 hours after administration of bortezomib (Bz), dexamethasone (Dex), thalidomide (Thal), lenalidomide (Len), and melphalan (Mel)**

| <b>Gene symbol</b> | <b>P values re Bz</b> | <b>P values re Dex</b> | <b>P values re Thal</b> | <b>P values re Len</b> | <b>P values re Mel</b> |
|--------------------|-----------------------|------------------------|-------------------------|------------------------|------------------------|
| PSMA7              | 0.0001                | 0.0786                 | 0.9314                  | 0.6567                 | 0.3136                 |
| PSMB2              | 0.0000                | 0.0638                 | 0.5994                  | 0.7235                 | 0.0067                 |
| PSMB3              | 0.0059                | 0.8810                 | 0.8071                  | 0.1495                 | 0.1171                 |
| PSMC4              | 0.0002                | 0.7125                 | 0.9530                  | 0.3164                 | 0.2970                 |
| PSMC5              | 0.0007                | 0.9406                 | 0.6600                  | 0.4765                 | 0.0750                 |
| PSMD14             | 0.0000                | 0.4206                 | 0.8290                  | 0.4682                 | 0.0402                 |
| PSMD2              | 0.0008                | 0.7275                 | 0.7783                  | 0.1120                 | 0.2004                 |
| PSMB4              | 0.0001                | 0.4902                 | 0.1411                  | 0.0193                 | 0.7144                 |
| PSMD4              | 0.0000                | 0.1962                 | 0.4422                  | 0.9393                 | 0.8847                 |
| SDC1               | 0.1728                | 0.5477                 | 0.8025                  | 0.5247                 | 0.8680                 |
| DKK1               | 0.2213                | 0.4411                 | 0.0000                  | 0.0001                 | 0.9125                 |

**Table S2.2. Mean and standard deviation regarding gene expression changes 48 hours after administration of bortezomib (Bz), dexamethasone (Dex), thalidomide (Thal), lenalidomide (Len), and melphalan (Mel)**

| Gene symbol | Mean change after Bz | SE of change after Bz | Mean change after Dex | SE of change after Dex | Mean change after Thal | SE of change after Thal | Mean change after Len | SE of change after Len | Mean change after Mel | SE of change after Mel |
|-------------|----------------------|-----------------------|-----------------------|------------------------|------------------------|-------------------------|-----------------------|------------------------|-----------------------|------------------------|
| PSMA7       | 0.21                 | 0.05                  | -0.33                 | 0.18                   | 0.02                   | 0.17                    | -0.10                 | 0.23                   | -0.07                 | 0.06                   |
| PSMB2       | 0.17                 | 0.04                  | -0.14                 | 0.07                   | -0.03                  | 0.05                    | -0.02                 | 0.05                   | -0.16                 | 0.06                   |
| PSMB3       | 0.13                 | 0.05                  | -0.01                 | 0.06                   | 0.02                   | 0.07                    | -0.09                 | 0.06                   | -0.08                 | 0.05                   |
| PSMC4       | 0.16                 | 0.04                  | 0.02                  | 0.06                   | 0.00                   | 0.06                    | -0.07                 | 0.06                   | -0.07                 | 0.07                   |
| PSMC5       | 0.17                 | 0.05                  | 0.00                  | 0.05                   | 0.02                   | 0.05                    | 0.04                  | 0.05                   | -0.09                 | 0.05                   |
| PSMD14      | 0.23                 | 0.04                  | -0.07                 | 0.08                   | -0.02                  | 0.09                    | -0.06                 | 0.09                   | -0.12                 | 0.06                   |
| PSMD2       | 0.13                 | 0.04                  | 0.01                  | 0.03                   | -0.01                  | 0.04                    | -0.08                 | 0.05                   | -0.06                 | 0.05                   |
| PSMB4       | 0.17                 | 0.04                  | 0.04                  | 0.06                   | -0.07                  | 0.05                    | -0.10                 | 0.04                   | -0.02                 | 0.04                   |
| PSMD4       | 0.19                 | 0.04                  | 0.07                  | 0.05                   | -0.04                  | 0.06                    | 0.00                  | 0.06                   | -0.01                 | 0.08                   |
| SDC1        | -0.07                | 0.05                  | -0.04                 | 0.06                   | -0.02                  | 0.08                    | -0.06                 | 0.10                   | -0.01                 | 0.05                   |
| DKK1        | 0.10                 | 0.08                  | 0.18                  | 0.23                   | 1.22                   | 0.27                    | 1.44                  | 0.27                   | 0.01                  | 0.10                   |
